# Supplementary material for: Reactive Oxygen Species Cause Exercise-Induced Angina in a Myocardial Ischaemia-Reperfusion Injury Model
Source: Int J Mol Sci. 2022 Mar 4;23(5):2820. doi: 10.3390/ijms23052820 (PMC8910887; doi:10.3390/ijms23052820)
Supplement: Supplementary file 1 [file ijms-23-02820-s001.zip › ijms-1610629-supplementary.pdf]

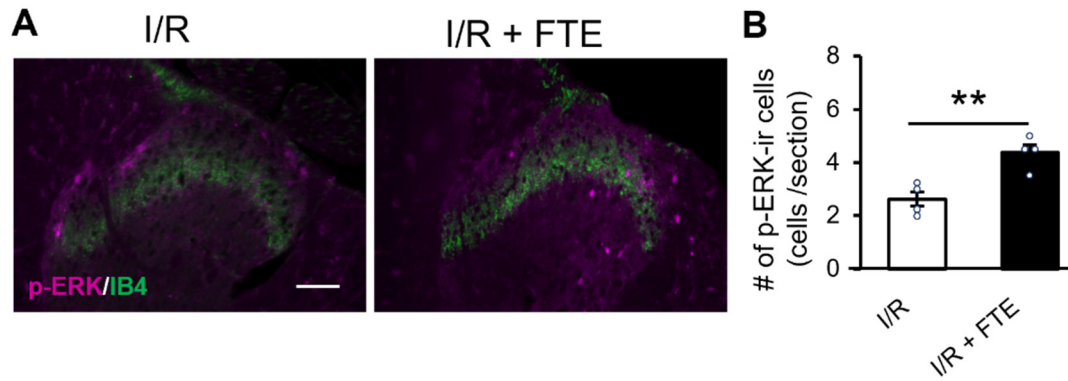

**Figure S1.** Forced treadmill exercise evokes angina in I/R model rats 7 days after surgery. **(A,B)** Double immunofluorescence histochemistry of p-ERK (magenta) and IB4 (green) in the T4–T5 dorsal horn of the I/R group and I/R + FTE group, and summary of p-ERK-immunoreactive spinal neurons in rats ( $n = 4$  each). All animals were used for the experiments 7 days after the surgery. Data are presented as mean  $\pm$  SE, unpaired Student's  $t$ -test. \*\*  $p < 0.01$ . Scale bar = 50  $\mu$ m (A). I/R, ischaemia–reperfusion; FTE, forced treadmill exercise; p-ERK, phosphorylated extracellular signal-regulated kinase; #, number.
